# Supplementary material for: An excimer process induced a turn-on fluorescent probe for detection of ultra-low concentration of mercury ions
Source: Royal Society of Chemistry journal article supplement (doi:10.1039/d4tb00934g), 2024-01-01
Supplement: d4tb00934g1.pdf [file d4tb00934g1.pdf]

**Supporting information for**  
**An excimer process induced a turn-on fluorescent probe for detection**  
**of ultra-low concentration of mercury ions**

Shujing Fang<sup>a</sup>, K. M. K. Swamy,<sup>b</sup> Wen-Yan Zan,<sup>c</sup> Juyoung Yoon<sup>b,\*</sup>, Shudi Liu<sup>a,\*</sup>

<sup>a</sup> College of Chemistry and Chemical Engineering, Yantai University, Yantai 264005, PR China

<sup>b</sup> Department of Chemistry and Nanoscience, Ewha Womans University, Seoul, 03760, Korea

<sup>c</sup> Institute of Molecular Science, Shanxi University, Taiyuan, 030006, PR China

E-mail: liushd2018@163.com, jyoona@ewha.ac.kr

## Supplemental results

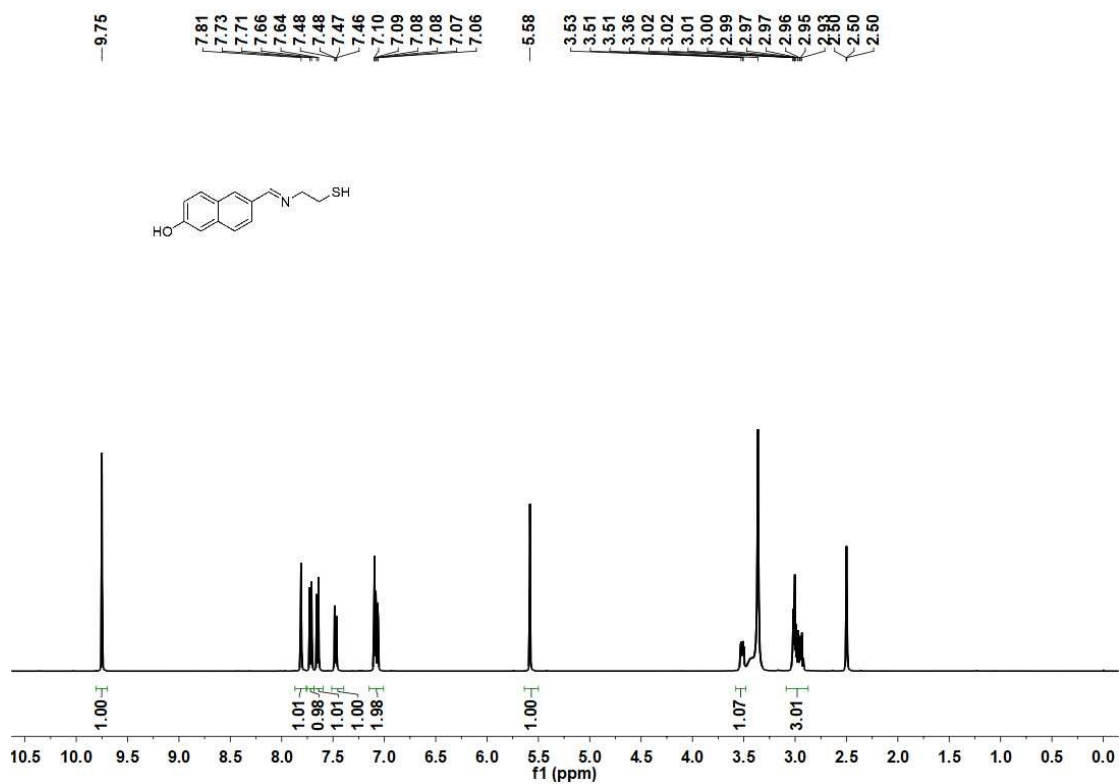

Figure S1 <sup>1</sup>H NMR spectrum of probe 1.

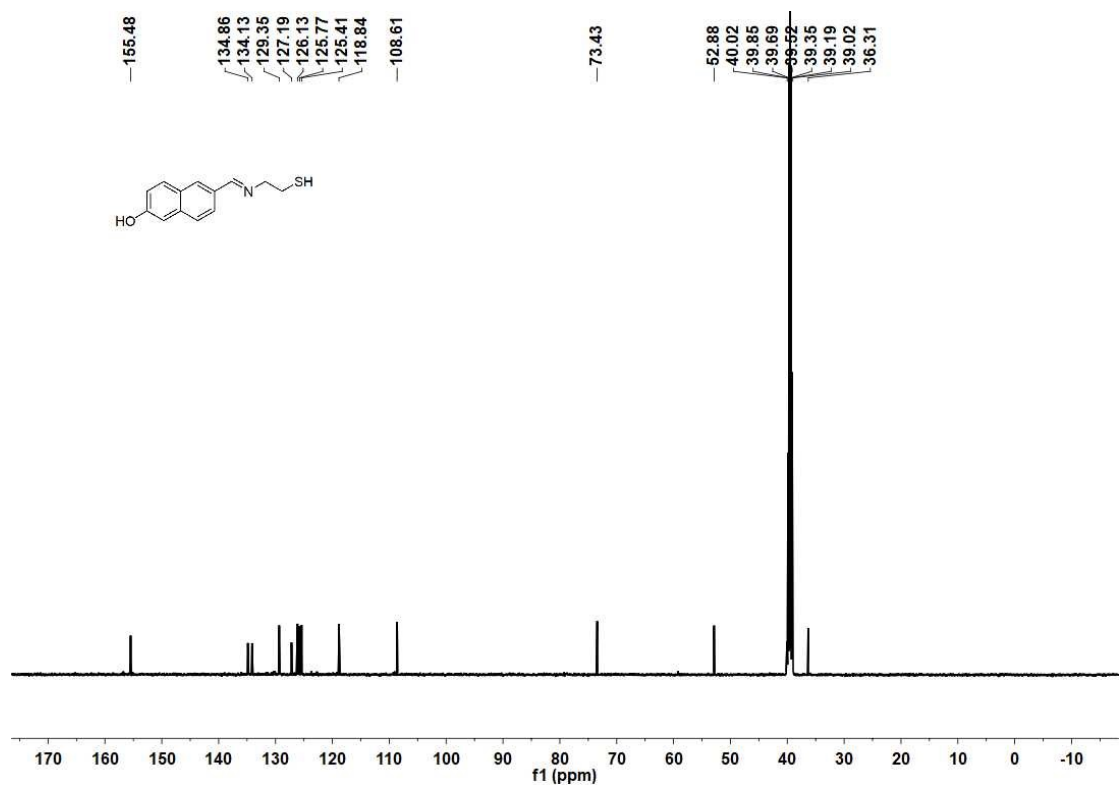

Figure S2 <sup>13</sup>C NMR spectrum of probe 1.

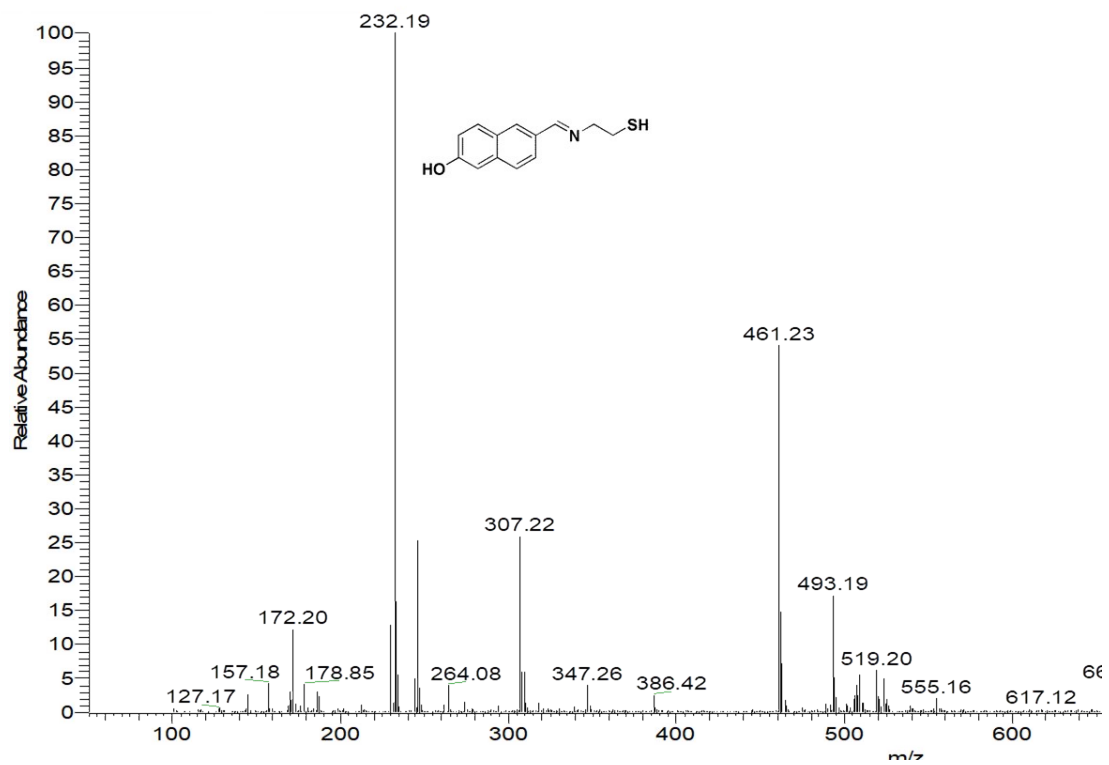

Figure S3 ESI-MS spectrum of probe 1.

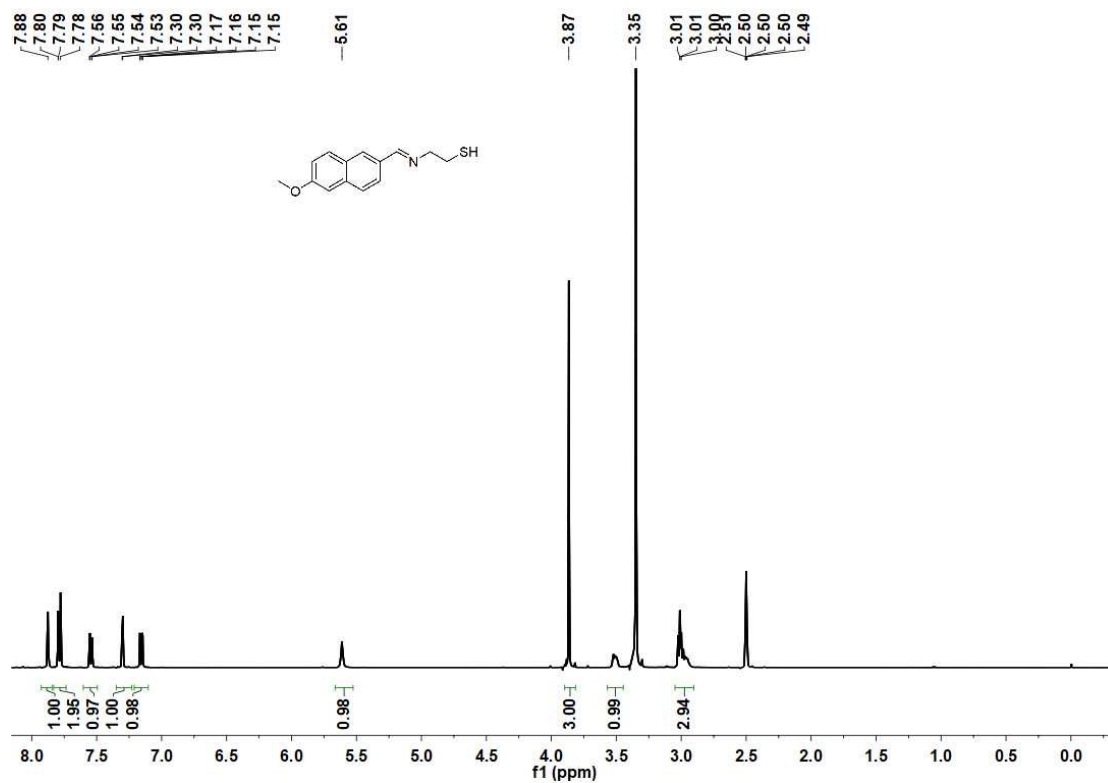

Figure S4  $^1\text{H}$  NMR spectrum of probe 2.

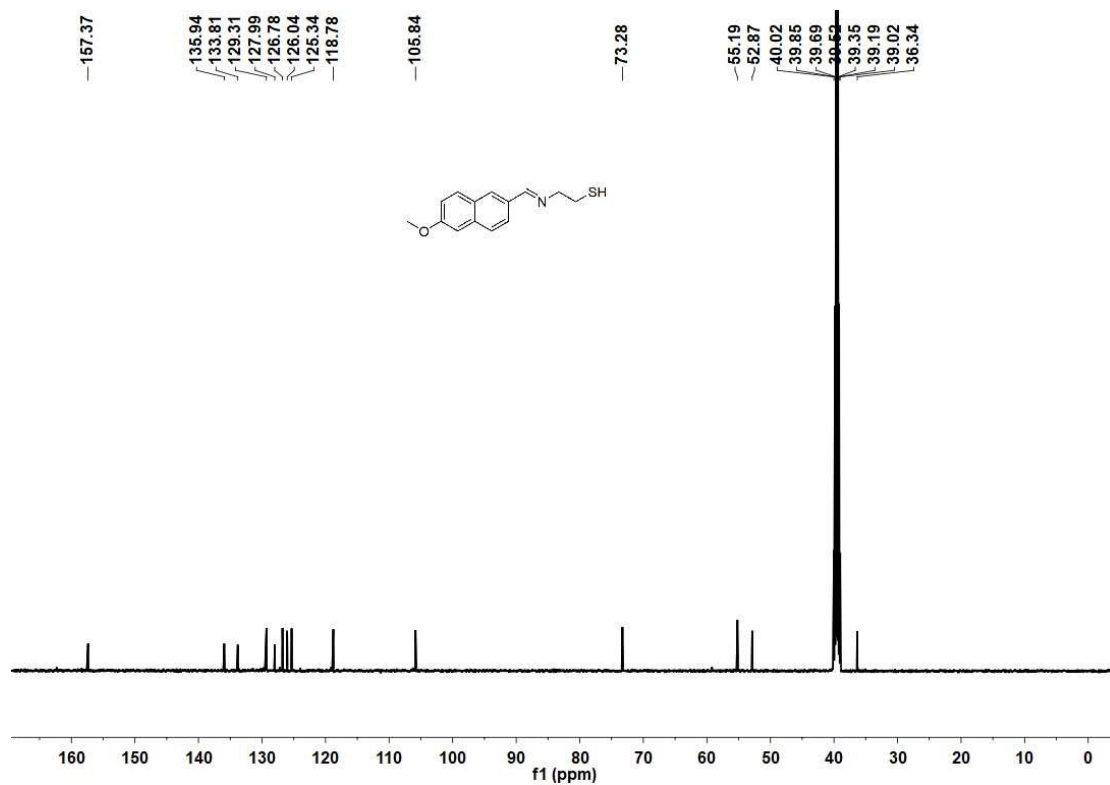

Figure S5  $^{13}\text{C}$  NMR spectrum of probe 2.

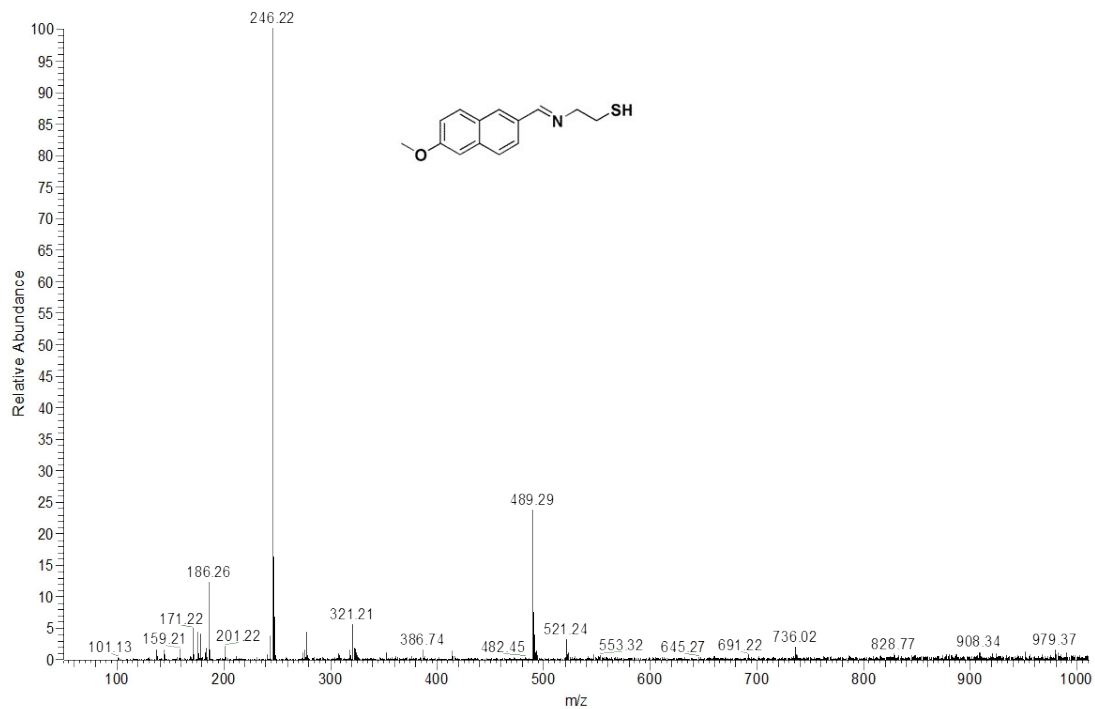

Figure S6 ESI-MS spectrum of probe 2.

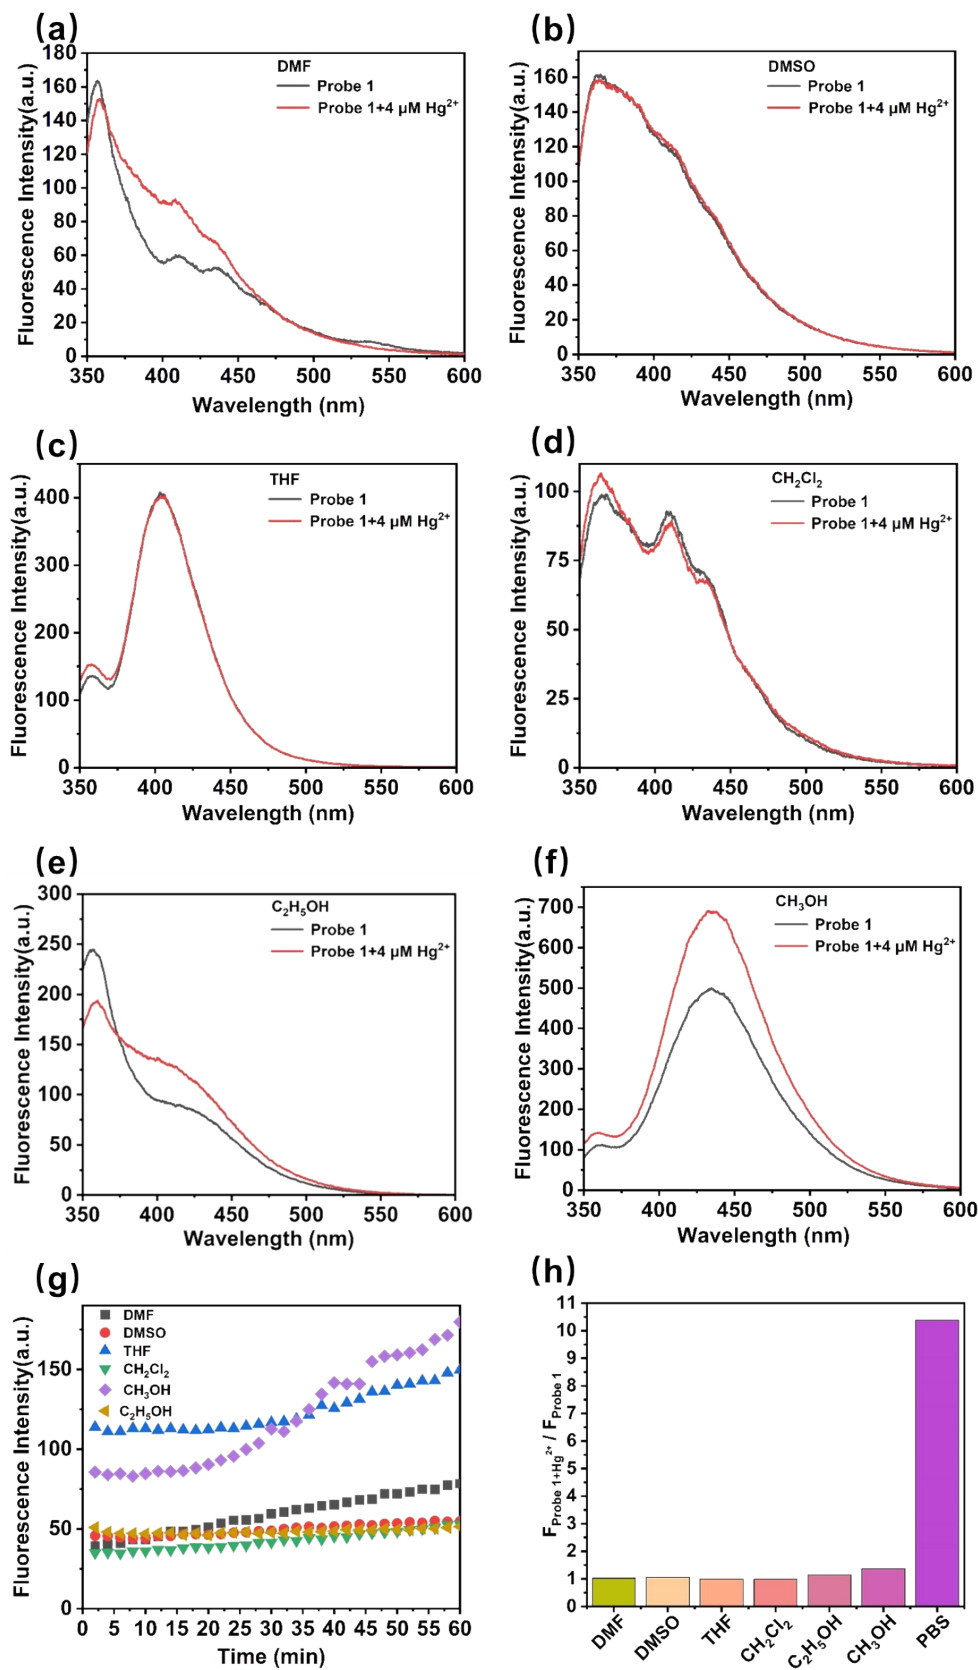

**Figure S7** The responses of probe 1 (10  $\mu\text{M}$ ) with  $\text{Hg}^{2+}$  (4  $\mu\text{M}$ ) in different solvents. (a) DMF. (b) DMSO. (c) THF. (d)  $\text{CH}_2\text{Cl}_2$ . (e)  $\text{C}_2\text{H}_5\text{OH}$ . (f)  $\text{CH}_3\text{OH}$ . (g) time-dependent effects of probe 1 (10  $\mu\text{M}$ )

in different solvents. (h) The ratio of fluorescence intensity in the presence and absence of  $\text{Hg}^{2+}$ .

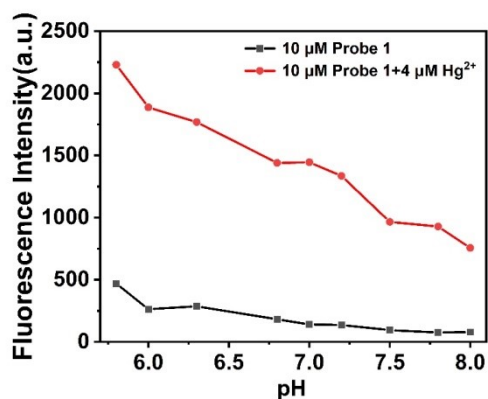

**Figure S8** The fluorescence intensities of probe 1 (10  $\mu\text{M}$ ) with  $\text{Hg}^{2+}$  (4  $\mu\text{M}$ ) in PBS buffer solution at different pH (5.8 to 8.0).

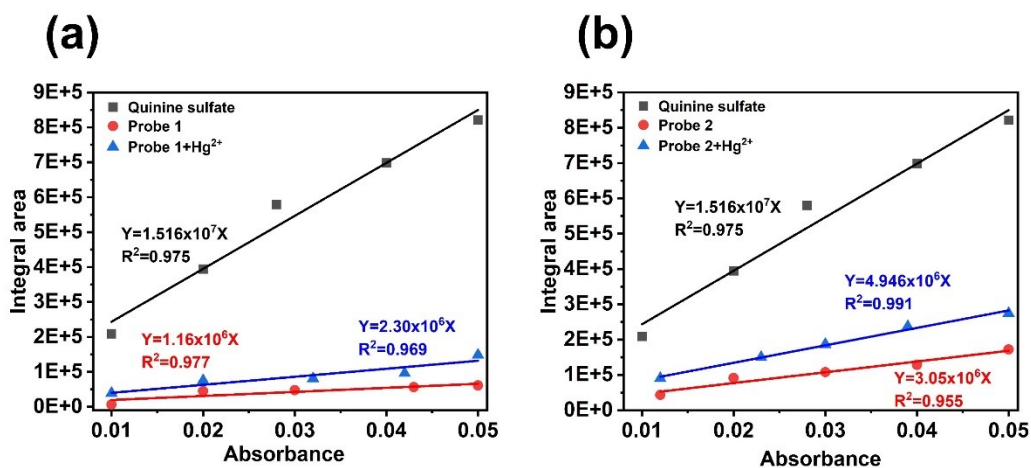

**Figure S9** Quantum yields of (a) probe 1 and probe 1 +  $\text{Hg}^{2+}$ , (b) probe 2 and probe 2 +  $\text{Hg}^{2+}$  in PBS buffer solution with quinine sulfate (0.54, 0.1 M  $\text{H}_2\text{SO}_4$ ) as a reference.

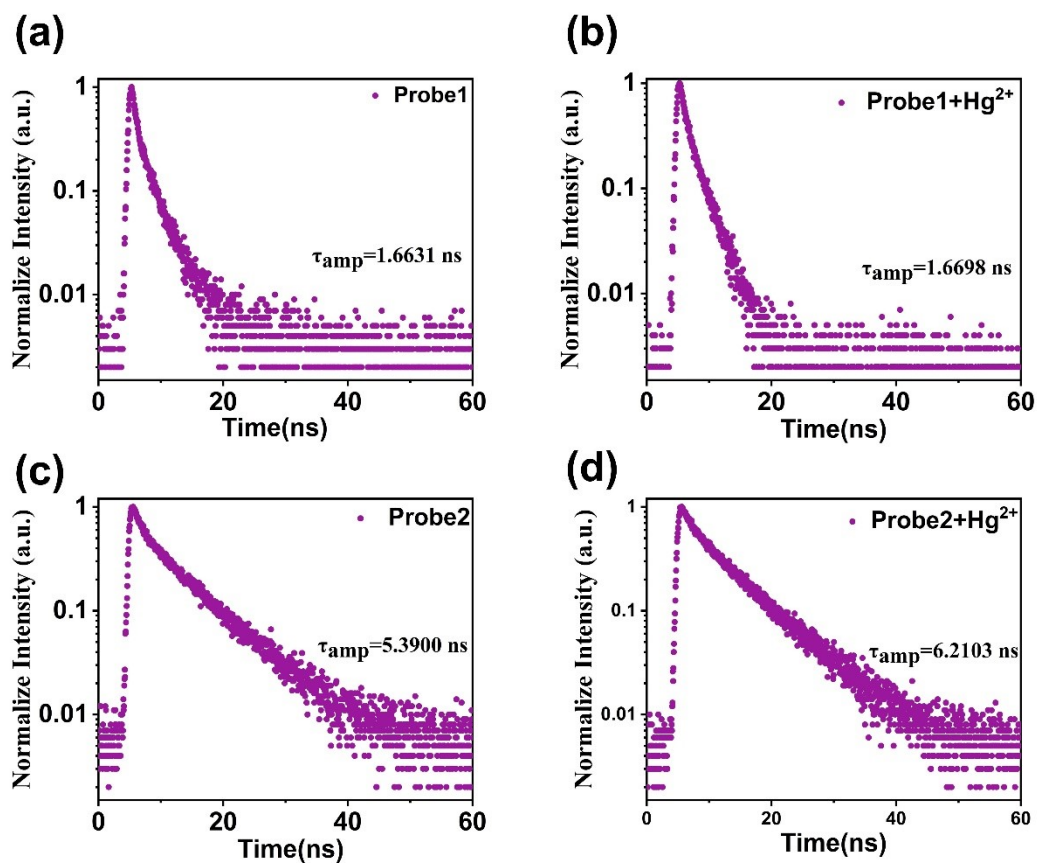

**Figure S10** (a, b) Fluorescence lifetimes of probe 1 and probe 1 + Hg<sup>2+</sup>; (c, d) Fluorescence lifetimes of probe 2 and probe 2 + Hg<sup>2+</sup>.

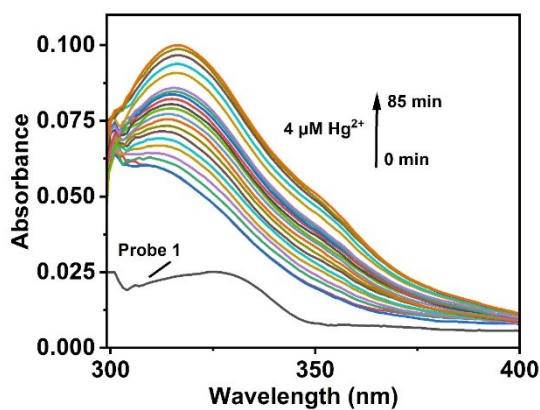

**Figure S11** UV-vis spectra of probe 1 (10 μM) in the presence of Hg<sup>2+</sup> (4 μM) in PBS buffer solution.

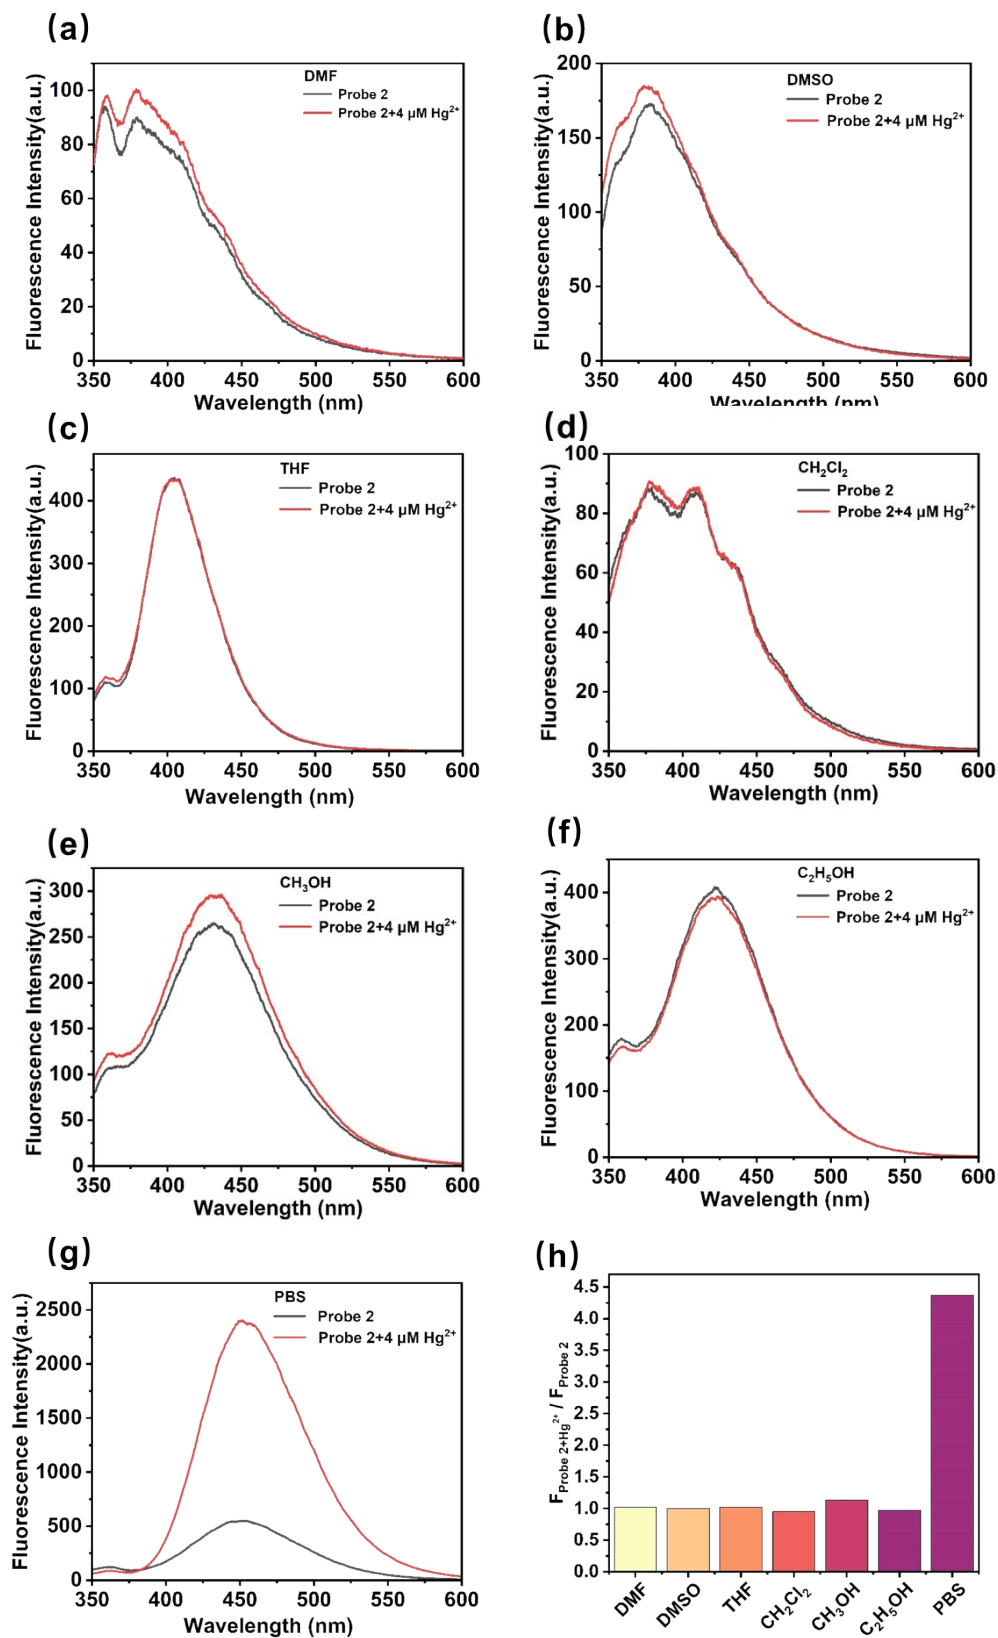

**Figure S12** The responses of probe 2 (10  $\mu\text{M}$ ) with  $\text{Hg}^{2+}$  (4  $\mu\text{M}$ ) in different solvents. (a) DMF. (b) DMSO. (c) THF. (d)  $\text{CH}_2\text{Cl}_2$ . (e)  $\text{CH}_3\text{OH}$ . (f)  $\text{C}_2\text{H}_5\text{OH}$ . (g) PBS. (h) The ratio of fluorescence intensity in the presence and absence of  $\text{Hg}^{2+}$ .



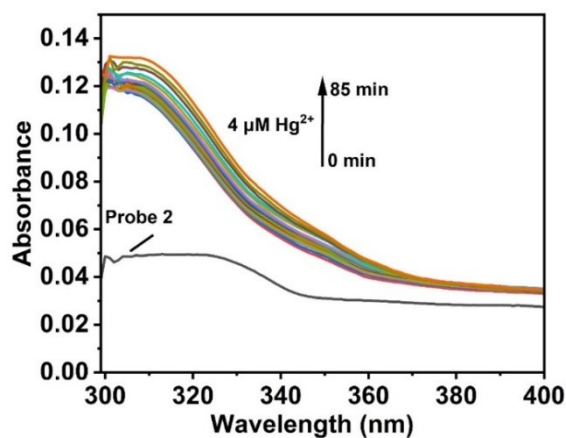

**Figure S13** UV-vis spectra of probe 2 (10  $\mu\text{M}$ ) in the presence of  $\text{Hg}^{2+}$  (4  $\mu\text{M}$ ) in PBS buffer solution.

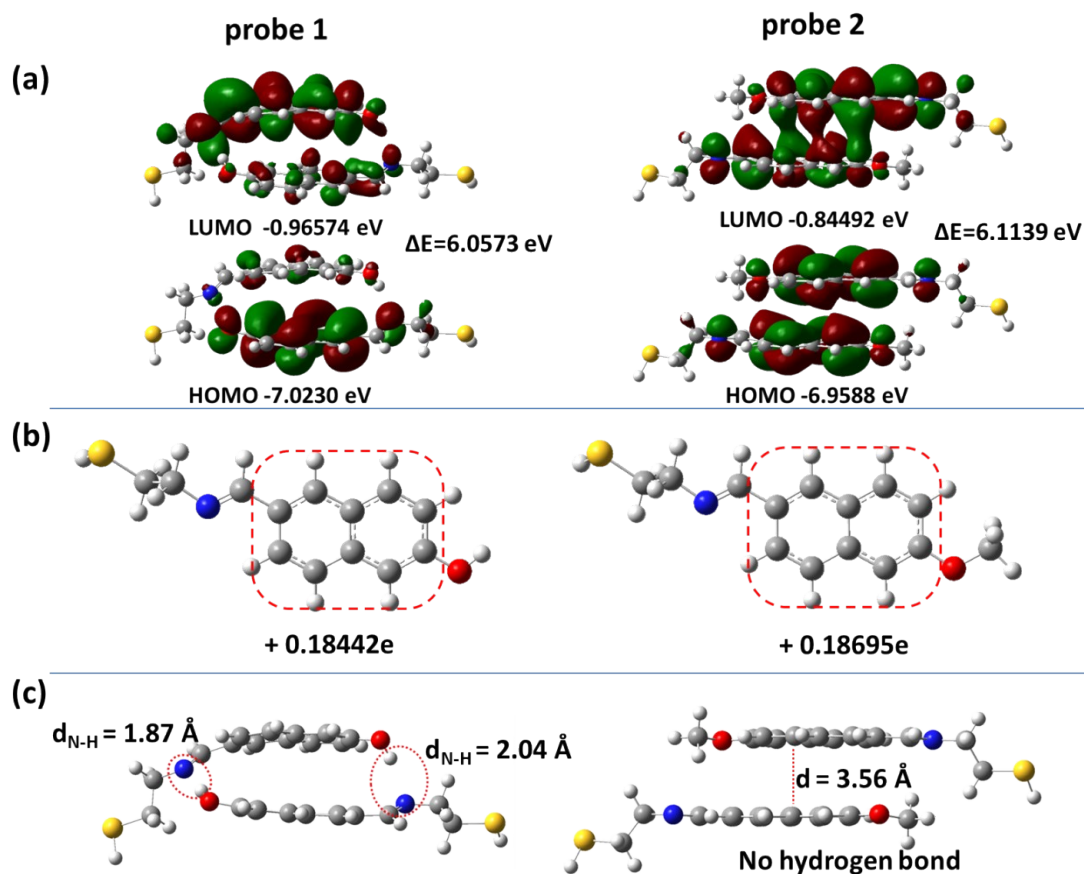

**Figure S14** DFT theoretical calculations of probe 1 and probe 2 [1-5]. (a) HOMO and LUMO orbitals of these two probes. (b) The electronic loss abilities of the naphthalene portion in two probes. (c) The  $\pi$ - $\pi$  stacking mode of two probes.

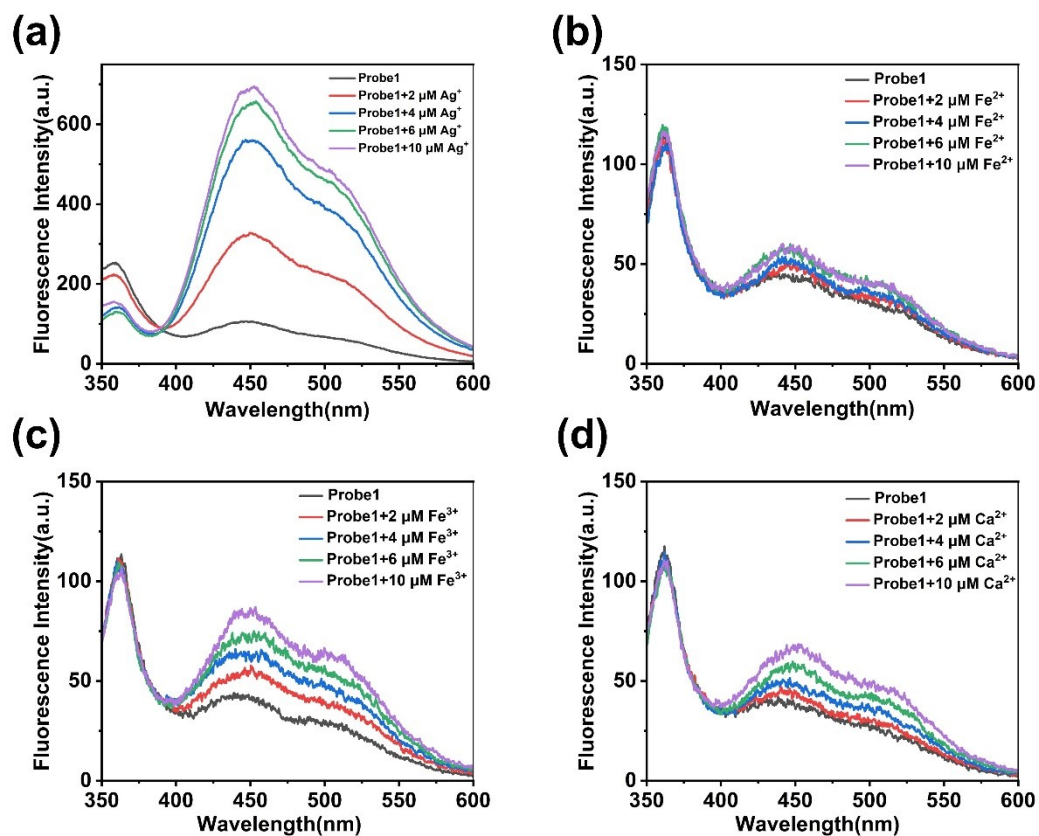

**Figure S15** The concentration-dependent fluorescent spectra of probe 1 (10 μM) versus Ag<sup>+</sup>, Fe<sup>2+</sup>, Fe<sup>3+</sup>, Ca<sup>2+</sup> (0, 2, 4, 6 and 10 μM) in PBS buffer solution.

**Table S1:** Previous reported fluorescence probes for mercury ion detection.

| No. | Probes                                                                              | Medium                                          | LOD                 | Applications                                            | Ref. |
|-----|-------------------------------------------------------------------------------------|-------------------------------------------------|---------------------|---------------------------------------------------------|------|
| 1   | 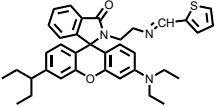   | EtOH:H <sub>2</sub> O (1:1, v/v)                | 1 nM                | IMTECH No. 3018 cells, water samples                    | [6]  |
| 2   |    | EtOH:H <sub>2</sub> O (1:1, v/v)                | 1.3 nM              | L929 cells, animal tissues, plant tissues               | [7]  |
| 3   |    | EtOH:Tris-HCl buffer (1:9, v/v)                 | 1.73 nM             | HeLa cells, zebrafish, nude mouse                       | [8]  |
| 4   |    | HEPES buffer (1% CH <sub>3</sub> CN)            | 4.02 nM,<br>1.82 nM | Cells                                                   | [9]  |
| 5   |  | PBS buffer (0.2% DMSO)                          | 2.4 nM              | MCF cells                                               | [10] |
| 6   |  | HEPES buffer                                    | 3.6 nM              | RAW 264.7 macrophage cells, zebrafish, water samples    | [11] |
| 7   |  | HEPES buffer: EtOH (1: 1, v/v)                  | 5.8 nM              | biological serum samples                                | [12] |
| 8   |  | PBS:C <sub>2</sub> H <sub>5</sub> OH (9/1, v/v) | 9.1 nM              | Glioma cells, lake water                                | [13] |
| 9   |  | HEPES buffer: ACN (3:7, v/v)                    | 10 nM               | HeLa cells, water samples, paper strips, protein medium | [14] |
| 10  |  | EtOH:H <sub>2</sub> O (6:4, v/v)                | 17.8 nM             | HeLa cells                                              | [15] |

|    |                                                                                     |                                   |          |                               |           |
|----|-------------------------------------------------------------------------------------|-----------------------------------|----------|-------------------------------|-----------|
| 11 | 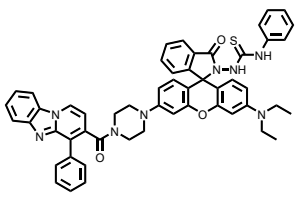   | EtOH:H <sub>2</sub> O (2:8, v/v)  | 18.8 nM  | Glioma cells                  | [16]      |
| 12 |    | H <sub>2</sub> O: THF (1:99, v/v) | 20 nM    | fibers                        | [17]      |
| 13 |    | EtOH:H <sub>2</sub> O (1:1, v/v)  | 20.7 nM  | water samples                 | [18]      |
| 14 |    | MeOH:H <sub>2</sub> O (3:7, v/v)  | 26.4 nM  | HeLa cells,                   | [19]      |
| 15 |   | PBS buffer: DMF(8:2, v/v)         | 39 nM    | Cells                         | [20]      |
| 16 |  | EtOH: Tris-HCl buffer (1:1, v/v)  | 40 nM    | water samples                 | [21]      |
| 17 |  | ACN:H <sub>2</sub> O (1:99, v/v)  | 60.78 nM | sf9 cells,<br>water samples   | [22]      |
| 18 |  | Water                             | 97 nM    | HeLa cells,<br>water samples  | [23]      |
| 19 |  | PBS buffer (10 mM)                | 1.98 nM  | water samples,<br>HepG2 cells | This work |

**Table S2** the atomic charges of C and H on naphthalene portion in probe 1 and probe 2.

| probe 1 |      |               | probe 2 |      |               |
|---------|------|---------------|---------|------|---------------|
| No.     | Atom | Atomic charge | No.     | Atom | Atomic charge |
| 1       | C    | 0.30364       | 1       | C    | 0.30164       |
| 2       | C    | -0.25448      | 2       | C    | -0.24045      |
| 3       | C    | -0.02620      | 3       | C    | -0.02996      |
| 4       | C    | -0.09386      | 4       | C    | -0.09369      |
| 5       | C    | -0.15097      | 5       | C    | -0.15083      |
| 6       | C    | -0.27849      | 6       | C    | -0.29104      |
| 7       | H    | 0.21337       | 7       | H    | 0.21290       |
| 8       | H    | 0.22350       | 8       | H    | 0.22255       |
| 9       | C    | -0.18524      | 9       | C    | -0.18379      |
| 10      | C    | -0.13501      | 10      | C    | -0.13416      |
| 11      | H    | 0.21370       | 11      | H    | 0.21199       |
| 12      | H    | 0.20984       | 12      | H    | 0.22011       |
| 13      | C    | -0.12610      | 13      | C    | -0.12623      |
| 14      | C    | -0.17100      | 14      | C    | -0.17329      |
| 15      | H    | 0.20591       | 15      | H    | 0.20572       |
| 16      | H    | 0.23581       | 16      | H    | 0.23548       |

## References

[1]M. J. FRISCH, G. W. TRUCKS, H. B. SCHLEGEL, et al., Gaussian 16, revision B.01, Gaussian, Inc., Wallingford, CT, 2016.

[2]ZHAO, Y.; TRUHLAR, D. G. The M06 suite of density functionals for main group thermochemistry, thermochemical kinetics, noncovalent interactions, excited states, and transition elements: two new functionals and systematic testing of four M06-class functionals and 12 other functionals. *Theor. Chem. Acc.* 2008, 120, 215–241.

[3]WEIGEND, F.; AHLRICHS, R. Balanced basis sets of split valence, triple zeta valence and quadruple zeta valence quality for H to Rn: design and assessment of accuracy. *Phys. Chem. Chem. Phys.* 2005, 7, 3297–3305.

[4]GRIMME, S.; ANTONY, J.; EHRLICH, S.; KRIEG, H. A consistent and accurate ab initio

parameterization of density functional dispersion correction (DFT-D) for the 94 elements H-Pu. *J. Chem. Phys.* 2010, 132, 154104.

[5] GLENDENING ED, BADENHOOP JK, REED AE, CARPENTER JE, BOHMANN JA, MORALES CM, et al. NBO 5.0/6.0. Madison: Theoretical Chemistry Institute, University of Wisconsin; 2001

[6] MANDAL S, BANERJEE A, LOHAR S, et al. Selective sensing of Hg<sup>2+</sup> using rhodamine-thiophene conjugate: red light emission and visual detection of intracellular Hg<sup>2+</sup> at nanomolar level [J]. *J. Hazard. Mater.*, 2013, 261: 198-205.

[7] YANG Y, SHEN R, WANG Y-Z, et al. A selective turn-on fluorescent sensor for Hg (II) in living cells and tissues [J]. *Sensor Actuat. B-Chem.*, 2018, 255: 3479-3487.

[8] XIAO H, LI J, WU K, et al. A turn-on BODIPY-based fluorescent probe for Hg (II) and its biological applications [J]. *Sensor Actuat. B-Chem.*, 2015, 213: 343-350.

[9] NEUPANE L N, PARK J, MEHTA P K, et al. Fast and sensitive fluorescent detection of inorganic mercury species and methylmercury using a fluorescent probe based on the displacement reaction of arylboronic acid with the mercury species [J]. *Chem. Commun. (Camb)*, 2020, 56(19): 2941-2944.

[10] SONG C, YANG W, ZHOU N, et al. Fluorescent theranostic agents for Hg<sup>2+</sup> detection and detoxification treatment [J]. *Chem. Commun. (Camb)*, 2015, 51(21): 4443-4446.

[11] DUAN Q, ZHU H, LIU C, et al. A carbonothioate-based far-red fluorescent probe for the specific detection of mercury ions in living cells and zebrafish [J]. *Analyst*, 2019, 144(4): 1426-1432.

[12] ZHOU Y, HE X, CHEN H, et al. An ESIPT/ICT modulation based ratiometric fluorescent probe for sensitive and selective sensing Hg<sup>2+</sup> [J]. *Sensor Actuat. B-Chem.*, 2017, 247: 626-631.

[13] LI Y, QI S, XIA C, et al. A FRET ratiometric fluorescent probe for detection of Hg<sup>2+</sup> based on an imidazo[1,2-a]pyridine-rhodamine system [J]. *Anal. Chim. Acta*, 2019, 1077: 243-248.

[14] SRIVASTAVA P, RAZI S S, ALI R, et al. Selective naked-eye detection of Hg<sup>2+</sup> through an efficient turn-on photoinduced electron transfer fluorescent probe and its real applications [J]. *Anal. Chem.*, 2014, 86(17): 8693-8699.

[15] VENGAIAN K M, BRITTO C D, SEKAR K, et al. Phenothiazine-diaminomaleonitrile based Colorimetric and Fluorescence "Turn-off-on" Sensing of Hg<sup>2+</sup> and S<sup>2-</sup> [J]. *Sensor Actuat. B-Chem.*, 2016, 235: 232-240.

- [16] GE Y, LIU A, JI R, et al. Detection of Hg<sup>2+</sup> by a FRET ratiometric fluorescent probe based on a novel pyrido[1,2-a]benzimidazole-rhodamine system [J]. *Sensor Actuat. B-Chem.*, 2017, 251: 410-415.
- [17] ZHAO L, ZHANG Z, LIU Y, et al. Fibrous strips decorated with cleavable aggregation-induced emission probes for visual detection of Hg<sup>2+</sup> [J]. *J. Hazard. Mater.*, 2020, 385: 121556.
- [18] LIANG Q, ZHOU W, WU A, et al. A novel pyrene - based “off - on” fluorescent probe with high selectivity and sensitivity for Hg<sup>2+</sup> [J]. *J. Chin. Chem. Soc.*, 2023, 70(10): 1937-1943.
- [19] VINOTH KUMAR G G, KESAVAN M P, TAMILSELVI A, et al. A reversible fluorescent chemosensor for the rapid detection of Hg<sup>2+</sup> in an aqueous solution: Its logic gates behavior [J]. *Sensor Actuat. B-Chem.*, 2018, 273: 305-315.
- [20] LIN W, CAO X, DING Y, et al. A highly selective and sensitive fluorescent probe for Hg<sup>2+</sup> imaging in live cells based on a rhodamine-thioamide-alkyne scaffold [J]. *Chem. Commun. (Camb)*, 2010, 46(20): 3529-3531.
- [21] MA Q J, ZHANG X B, ZHAO X H, et al. A highly selective fluorescent probe for Hg<sup>2+</sup> based on a rhodamine-coumarin conjugate [J]. *Anal. Chim. Acta*, 2010, 663(1): 85-90.
- [22] HONG M, LU X, CHEN Y, et al. A novel rhodamine-based colorimetric and fluorescent sensor for Hg<sup>2+</sup> in water matrix and living cell [J]. *Sensor Actuat. B-Chem.*, 2016, 232: 28-36.
- [23] LI D, LI C Y, LI Y F, et al. Rhodamine-based chemodosimeter for fluorescent determination of Hg<sup>2+</sup> in 100% aqueous solution and in living cells [J]. *Anal. Chim. Acta*, 2016, 934: 218-225.
